# Supplementary material
Source: Springer Nature journal article supplement (https://www.springermedizin.de/resource/supplementary/12911_2013_829_MOESM4_ESM.pdf/9526742)
Supplement: MOESM4 [file 9526742]

Key


 ← More visual attention    less visual attention →

## a Example of respondent 8 who considered “Cost,” “Apparatus,” and “Reduction in Snoring” to be most important

*Conventional display with heatmap*

|                                | No Treatment     | Dental appliance       | CPAP                     |
|--------------------------------|------------------|------------------------|--------------------------|
| Daytime sleepiness/fatigue     | No improvement   | Moderate improvement   | Return to normal         |
| Risk of cardiovascular disease | 4 in 100         | 2 in 100               | 1 in 100                 |
| Reduction in snoring           | Remains the same | Partially reduced      | Completely eliminated    |
| Apparatus                      | None             | Relatively invasive    | Invasive and noisy       |
| Portability                    | No issue         | No issue               | Limits travel            |
| Temporary side-effects         | None             | Mouth pain and dryness | Pain and skin irritation |
| Permanent side-effects         | None             | Change in bite         | None                     |
| Cost                           | \$0              | \$2500                 | \$1500                   |
| Which do you prefer?           | ○                | ○                      | ○                        |

*In the conventional PfDA, the individual spent 32% of their time looking at the attributes “Daytime sleepiness/fatigue” and “Risk of cardiovascular disease” (indicated in red), and spent 22% of their time considering the attributes of most importance to them, “Cost” and “Apparatus.” In the DCIDA, this individual switched to looking at their most important attributes 41% of time.*

## b Example of Respondent 12 who considered “Permanent side-effects,” “Sleepiness/fatigue,” and “Portability” to be most important.

*Conventional display with heatmap*

|                                | No Treatment     | Dental appliance       | CPAP                     |
|--------------------------------|------------------|------------------------|--------------------------|
| Daytime sleepiness/fatigue     | No improvement   | Moderate improvement   | Return to normal         |
| Risk of cardiovascular disease | 4 in 100         | 2 in 100               | 1 in 100                 |
| Reduction in snoring           | Remains the same | Partially reduced      | Completely eliminated    |
| Apparatus                      | None             | Relatively invasive    | Invasive and noisy       |
| Portability                    | No issue         | No issue               | Limits travel            |
| Temporary side-effects         | None             | Mouth pain and dryness | Pain and skin irritation |
| Permanent side-effects         | None             | Change in bite         | None                     |
| Cost                           | \$0              | \$2500                 | \$1500                   |
| Which do you prefer?           | ○                | ○                      | ○                        |

*The DCIDA display with heatmap*

|                                | No Treatment     | Dental appliance       | CPAP                     |
|--------------------------------|------------------|------------------------|--------------------------|
| Cost                           | \$0              | \$2500                 | \$1500                   |
| Apparatus                      | None             | Relatively invasive    | Invasive and noisy       |
| Reduction in snoring           | Remains the same | Partially reduced      | Completely eliminated    |
| Daytime sleepiness/fatigue     | No improvement   | Moderate improvement   | Return to normal         |
| Risk of cardiovascular disease | 4 in 100         | 2 in 100               | 1 in 100                 |
| Permanent side-effects         | None             | Change in bite         | None                     |
| Temporary side-effects         | None             | Mouth pain and dryness | Pain and skin irritation |
| Portability                    | No issue         | No issue               | Limits travel            |
| Which do you prefer?           | ○                | ○                      | ○                        |

*The DCIDA display with heatmap*

|                                | No Treatment     | Dental appliance       | CPAP                     |
|--------------------------------|------------------|------------------------|--------------------------|
| Permanent side-effects         | None             | Change in bite         | None                     |
| Daytime sleepiness/fatigue     | No improvement   | Moderate improvement   | Return to normal         |
| Portability                    | No issue         | No issue               | Limits travel            |
| Apparatus                      | None             | Relatively invasive    | Invasive and noisy       |
| Reduction in snoring           | Remains the same | Partially reduced      | Completely eliminated    |
| Risk of cardiovascular disease | 4 in 100         | 2 in 100               | 1 in 100                 |
| Cost                           | \$0              | \$2500                 | \$1500                   |
| Temporary side-effects         | None             | Mouth pain and dryness | Pain and skin irritation |
| Which do you prefer?           | ○                | ○                      | ○                        |
